# Supplementary material for: Integrated differential transcriptome maps of Acute Megakaryoblastic Leukemia (AMKL) in children with or without Down Syndrome (DS)
Source: PubMed Central journal article supplement (PMC4304173; doi:10.1186/s12920-014-0063-z), 2014-12-05
Supplement: 12920_2014_63_MOESM2_ESM.pdf [file 12920_2014_63_MOESM2_ESM.pdf]

**Additional file 2.** List of the genes cited in the paper. We indicate gene symbol, gene name and location based on Gene database (<http://www.ncbi.nlm.nih.gov/gene>).

| Gene symbol     | Gene name                                                                  | Location     |
|-----------------|----------------------------------------------------------------------------|--------------|
| <i>ADAMTS1</i>  | ADAM metallopeptidase with thrombospondin type 1 motif, 1                  | 21q21.2      |
| <i>ALAS1</i>    | aminolevulinate, delta-, synthase 1                                        | 3p21.1       |
| <i>ALS2CR12</i> | amyotrophic lateral sclerosis 2 (juvenile) chromosome region, candidate 12 | 2q33.1       |
| <i>APOC1</i>    | apolipoprotein C-I                                                         | 19q13.2      |
| <i>APOC2</i>    | apolipoprotein C-II                                                        | 19q13.2      |
| <i>APOE</i>     | apolipoprotein E                                                           | 19q13.2      |
| <i>ASAP2</i>    | ArfGAP with SH3 domain, ankyrin repeat and PH domain 2                     | 2p24         |
| <i>ATP6V0D2</i> | ATPase, H <sup>+</sup> transporting, lysosomal 38kDa, V0 subunit d2        | 8q21.3*      |
| <i>BACH1</i>    | BTB and CNC homology 1, basic leucine zipper transcription factor 1        | 21q22.11     |
| <i>BST2</i>     | bone marrow stromal cell antigen 2                                         | 19p13.1      |
| <i>C5orf46</i>  | chromosome 5 open reading frame 46                                         | 5q32         |
| <i>CBS</i>      | cystathionine-beta-synthase                                                | 21q22.3      |
| <i>CD46</i>     | CD46 molecule, complement regulatory protein                               | 1q32         |
| <i>CDA</i>      | cytidine deaminase                                                         | 1p36.2-p35   |
| <i>CDKL1</i>    | cyclin-dependent kinase-like 1 (CDC2-related kinase)\                      | 14q21.3      |
| <i>CDYL2</i>    | chromodomain protein, Y-like 2                                             | 16q23.2      |
| <i>CERKL</i>    | ceramide kinase-like                                                       | 2q31.3       |
| <i>CES3</i>     | carboxylesterase 3                                                         | 16q22.1      |
| <i>CGA</i>      | glycoprotein hormones, alpha polypeptide                                   | 6q12-q21     |
| <i>CLCA1</i>    | chloride channel accessory 1                                               | 1p22.3       |
| <i>CLEC12A</i>  | C-type lectin domain family 12, member A                                   | 12p13.2      |
| <i>CLEC2B</i>   | C-type lectin domain family 2, member B                                    | 12p13-p12    |
| <i>CMBL</i>     | carboxymethylenebutenolidase homolog (Pseudomonas)                         | 5p15.2       |
| <i>COL6A5</i>   | collagen, type VI, alpha 5                                                 | 3q22.1       |
| <i>COL6A6</i>   | collagen, type VI, alpha 6                                                 | 3q22.1       |
| <i>CRTC1</i>    | CREB regulated transcription coactivator 1                                 | 19p13.11     |
| <i>CSRNP1</i>   | cysteine-serine-rich nuclear protein 1                                     | 3p22         |
| <i>CXCL3</i>    | chemokine (C-X-C motif) ligand 3                                           | 4q21         |
| <i>CXCL5</i>    | chemokine (C-X-C motif) ligand 5                                           | 4q13.3       |
| <i>DCK</i>      | deoxycytidine kinase                                                       | 4q13.3-q21.1 |
| <i>DICER1</i>   | dicer 1, ribonuclease type III                                             | 14q32.13     |
| <i>DLGAP3</i>   | discs, large (Drosophila) homolog-associated protein 3                     | 1p35.3-p34.1 |
| <i>DRD4</i>     | dopamine receptor D4                                                       | 11p15.5      |
| <i>DYRK1A</i>   | dual-specificity tyrosine-(Y)-phosphorylation regulated kinase 1A          | 21q22.13     |
| <i>ERG</i>      | v-ets avian erythroblastosis virus E26 oncogene homolog                    | 21q22.3      |
| <i>ETS2</i>     | v-ets avian erythroblastosis virus E26 oncogene homolog 2                  | 21q22.2      |
| <i>FAM78B</i>   | family with sequence similarity 78, member B                               | 1q24.1       |
| <i>FCER1A</i>   | Fc fragment of IgE, high affinity I, receptor for; alpha polypeptide       | 1q23         |
| <i>FLJ22184</i> | putative uncharacterized protein FLJ22184                                  | 19p13.2      |

|                 |                                                                                                       |              |
|-----------------|-------------------------------------------------------------------------------------------------------|--------------|
| <i>FSIP2</i>    | fibrous sheath interacting protein 2                                                                  | 2q32.1       |
| <i>GABPA</i>    | GA binding protein transcription factor, alpha subunit 60kDa                                          | 21q21.3      |
| <i>GATA1</i>    | GATA binding protein 1 (globin transcription factor 1)                                                | Xp11.23      |
| <i>GATA2</i>    | GATA binding protein 2                                                                                | 3q21.3       |
| <i>GBP5</i>     | guanylate binding protein 5                                                                           | 1p22.2       |
| <i>GHRH</i>     | growth hormone releasing hormone                                                                      | 20q11.2      |
| <i>GNG11</i>    | guanine nucleotide binding protein (G protein), gamma 11                                              | 7q21         |
| <i>GP1BA</i>    | glycoprotein Ib (platelet), alpha polypeptide                                                         | 17p13.2      |
| <i>GPR171</i>   | G protein-coupled receptor 171                                                                        | 3q25.1       |
| <i>GSAP</i>     | gamma-secretase activating protein                                                                    | 7q11.23      |
| <i>GYP A</i>    | glycophorin A (MNS blood group)                                                                       | 4q31.21      |
| <i>GYP B</i>    | glycophorin B (MNS blood group)                                                                       | 4q31.21      |
| <i>GYP E</i>    | glycophorin E (MNS blood group)                                                                       | 4q31.1       |
| <i>GUCY1A3</i>  | guanylate cyclase 1, soluble, alpha 3                                                                 | 4q31.1-q31.2 |
| <i>GUCY1B3</i>  | guanylate cyclase 1, soluble, beta 3                                                                  | 4q31.3-q33   |
| <i>HBG1</i>     | hemoglobin, gamma A                                                                                   | 11p15.5      |
| <i>HBG2</i>     | hemoglobin, gamma G                                                                                   | 11p15.5      |
| <i>HDC</i>      | histidine decarboxylase                                                                               | 15q21-q22    |
| <i>HIST3H3</i>  | histone cluster 3, H3                                                                                 | 1q42         |
| <i>IFI27</i>    | interferon, alpha-inducible protein 27                                                                | 14q32        |
| <i>IGF1R</i>    | insulin-like growth factor 1 receptor                                                                 | 15q26.3      |
| <i>ILDR1</i>    | immunoglobulin-like domain containing receptor 1                                                      | 3q13.33      |
| <i>ITGA2B</i>   | integrin, alpha 2b (platelet glycoprotein IIb of IIb/IIIa complex, antigen CD41)                      | 17q21.32     |
| <i>ITGA4</i>    | integrin, alpha 4 (antigen CD49D, alpha 4 subunit of VLA-4 receptor)                                  | 2q31.3       |
| <i>ITGAL</i>    | integrin, alpha L (antigen CD11A (p180), lymphocyte function-associated antigen 1; alpha polypeptide) | 16p11.2      |
| <i>ITGB3</i>    | integrin, beta 3 (platelet glycoprotein IIIa, antigen CD61)                                           | 17q21.32     |
| <i>KIAA2022</i> | KIAA2022                                                                                              | Xq13.3       |
| <i>KIT</i>      | v-kit Hardy-Zuckerman 4 feline sarcoma viral oncogene homolog                                         | 4q11-q12     |
| <i>KLRB1</i>    | killer cell lectin-like receptor subfamily B, member 1                                                | 12p13        |
| <i>KLRF1</i>    | killer cell lectin-like receptor subfamily F, member 1                                                | 12p13.31     |
| <i>LBX1</i>     | ladybird homeobox 1                                                                                   | 10q24        |
| LOC100287628    | uncharacterized LOC100287628                                                                          | 16p13.2      |
| <i>LRRN1</i>    | leucine rich repeat neuronal 1                                                                        | 3p26.2       |
| <i>MAP3K10</i>  | mitogen-activated protein kinase kinase kinase 10                                                     | 19q13.2      |
| <i>MAP9</i>     | microtubule-associated protein 9                                                                      | 4q32.1       |
| <i>MARCH2</i>   | membrane-associated ring finger (C3HC4) 2, E3 ubiquitin protein ligase                                | 19p13.2      |
| <i>MED12L</i>   | mediator complex subunit 12-like                                                                      | 3q25.1       |
| <i>MPL</i>      | myeloproliferative leukemia virus oncogene                                                            | 1p34         |
| <i>MPV17L</i>   | MPV17 mitochondrial membrane protein-like                                                             | 16p13.11     |
| <i>MTIE</i>     | metallothionein 1E                                                                                    | 16q13        |
| <i>MTOR</i>     | mechanistic target of rapamycin (serine/threonine kinase)                                             | 1p36.2       |
| <i>MYCN</i>     | v-myc myelocytomatosis viral related oncogene, neuroblastoma derived (avian)                          | 2p24.3       |
| <i>NCOR2</i>    | nuclear receptor corepressor 2                                                                        | 12q24        |
| <i>NECAB1</i>   | N-terminal EF-hand calcium binding protein 1                                                          | 8q21.3       |

|                  |                                                                                       |              |
|------------------|---------------------------------------------------------------------------------------|--------------|
| <i>NR2F2-AS1</i> | NR2F2 antisense RNA 1                                                                 | 15q26.2      |
| <i>OLFM4</i>     | olfactomedin 4                                                                        | 13q14.3      |
| <i>OPHN1</i>     | oligophrenin 1                                                                        | Xq12         |
| <i>OR10A4</i>    | olfactory receptor, family 10, subfamily A, member 4                                  | 11p15.4      |
| <i>OR10A5</i>    | olfactory receptor, family 10, subfamily A, member 5                                  | 11p15.4      |
| <i>OTUD6B</i>    | OTU domain containing 6B                                                              | 8q21.3       |
| <i>P2RY13</i>    | purinergic receptor P2Y, G-protein coupled, 13                                        | 3q24         |
| <i>PDE6C</i>     | phosphodiesterase 6C, cGMP-specific, cone, alpha prime                                | 10q24        |
| <i>PF4</i>       | platelet factor 4                                                                     | 4q12-q21     |
| <i>PF4V1</i>     | platelet factor 4 variant 1                                                           | 4q12-q21     |
| <i>PIF1</i>      | PIF1 5'-to-3' DNA helicase                                                            | 15q22.31     |
| <i>PPBP</i>      | pro-platelet basic protein (chemokine (C-X-C motif) ligand 7)                         | 4q12-q13     |
| <i>PPP1R3B</i>   | protein phosphatase 1, regulatory subunit 3B                                          | 8p23.1       |
| <i>PRAME</i>     | preferentially expressed antigen in melanoma                                          | 22q11.22     |
| <i>PRF1</i>      | perforin 1 (pore forming protein)                                                     | 10q22        |
| <i>PTGS2</i>     | prostaglandin-endoperoxide synthase 2 (prostaglandin G/H synthase and cyclooxygenase) | 1q25.2-q25.3 |
| <i>PTPN12</i>    | protein tyrosine phosphatase, non-receptor type 12                                    | 7q11.23      |
| <i>PTPRO</i>     | protein tyrosine phosphatase, receptor type, O                                        | 12p13-p12    |
| <i>RHOBTB1</i>   | Rho-related BTB domain containing 1                                                   | 10q21.2      |
| <i>RPS12</i>     | ribosomal protein S12                                                                 | 6q23.2       |
| <i>RUNX1</i>     | runt-related transcription factor 1                                                   | 21q22.3      |
| <i>S100A8</i>    | S100 calcium binding protein A8                                                       | 1q21         |
| <i>S100A9</i>    | S100 calcium binding protein A9                                                       | 1q21         |
| <i>S100A12</i>   | S100 calcium binding protein A12                                                      | 1q21         |
| <i>SCD5</i>      | stearoyl-CoA desaturase 5                                                             | 4q21.22      |
| <i>SCGB3A2</i>   | secretoglobin, family 3A, member 2                                                    | 5q32         |
| <i>SLFNL1</i>    | schlafen-like 1                                                                       | 1p34.2       |
| <i>SLITRK6</i>   | SLIT and NTRK-like family, member 6                                                   | 13q31.1      |
| <i>SMOX</i>      | spermine oxidase                                                                      | 20p13        |
| <i>SOD1</i>      | superoxide dismutase 1, soluble                                                       | 21q22.11     |
| <i>SON</i>       | SON DNA binding protein                                                               | 21q22.11     |
| <i>SOSTDC1</i>   | sclerostin domain containing 1                                                        | 7p21.1       |
| <i>SPATA1</i>    | spermatogenesis associated 1                                                          | 1p22.3       |
| <i>SPINK2</i>    | serine peptidase inhibitor, Kazal type 2 (acrosin-trypsin inhibitor)                  | 4q12         |
| <i>SPINK7</i>    | serine peptidase inhibitor, Kazal type 7 (putative)                                   | 5q32         |
| <i>SPRR4</i>     | small proline-rich protein 4                                                          | 1q21.3       |
| <i>SPSB4</i>     | spla/ryanodine receptor domain and SOCS box containing 4                              | 3q23         |
| <i>SPTLC3</i>    | serine palmitoyltransferase, long chain base subunit 3                                | 20p12.1      |
| <i>ST18</i>      | suppression of tumorigenicity 18, zinc finger                                         | 8q11.23      |
| <i>TAL1</i>      | T-cell acute lymphocytic leukemia 1                                                   | 1p32         |
| <i>TEK</i>       | TEK tyrosine kinase, endothelial                                                      | 9p21         |
| <i>TERT</i>      | telomerase reverse transcriptase                                                      | 5p15.33      |
| <i>TMEFF2</i>    | transmembrane protein with EGF-like and two follistatin-like domains 2                | 2q32.3       |
| <i>TMEM241</i>   | transmembrane protein 241                                                             | 18q11.2      |

|                |                                                       |           |
|----------------|-------------------------------------------------------|-----------|
| <i>TNFSF14</i> | tumor necrosis factor (ligand) superfamily, member 14 | 19p13.3   |
| <i>TOP3B</i>   | topoisomerase (DNA) III beta                          | 22q11.22  |
| <i>TPSG1</i>   | tryptase gamma 1                                      | 16p13.3   |
| <i>TRIB1</i>   | tribbles pseudokinase 1                               | 8q24.13   |
| <i>TSPAN10</i> | tetraspanin 10                                        | 17q25.3   |
| <i>VIPR2</i>   | vasoactive intestinal peptide receptor 2              | 7q36.3    |
| <i>ZNF445</i>  | zinc finger protein 445                               | 3p21.32   |
| <i>ZNF521</i>  | zinc finger protein 521                               | 18q11.2   |
| <i>ZNF587B</i> | zinc finger protein 587B                              | 19q13.43* |

\* Cytoband was derived from the UCSC Genome Browser (<http://genome-euro.ucsc.edu/cgi-bin/hgGateway>).
